# Supplementary material for: Analysis of the autothermal operability of the Sabatier reaction in a heat-recirculating microreactor using CFD
Source: Royal Society of Chemistry journal article supplement (doi:10.1039/c9re00183b), 2019-01-01
Supplement: c9re00183b1.pdf [file c9re00183b1.pdf]

## ELECTRONIC SUPPLEMENTARY INFORMATION

### **Analysis of autothermal operability of Sabatier reaction in a heat recirculating microreactor using CFD**

Aswathy K. Raghu and Niket S. Kaisare\*

Department of Chemical Engineering, Indian Institute of Technology Madras,  
Chennai 600036, India

\*Corresponding Author: nkaisare@iitm.ac.in; Phone: [+91] (44) 2257-4176

#### **BRIEF ANALYSIS OF METHANATION KINETICS**

The kinetics chosen for this work were developed by Xu & Froment<sup>1</sup> for both reforming and methanation, which are reverse of each other. The authors ensured that thermodynamic consistency of the rate expressions. In this ESI document, we analyze Reaction-3, although the same arguments are valid for the other three reactions as well.

A brief literature review on CO<sub>2</sub> methanation shows that the activation energy on Ni catalyst is in the range of 70 to 100 kJ/mol. For example, Weatherbee & Bartholomew<sup>2</sup> reported a constant  $E_A = 94$  kJ/mol for Langmuir-Hinshelwood rate expression. Maatman & Hiemstra<sup>3</sup> reported activation energies at different CO<sub>2</sub>:H<sub>2</sub> ratios, and found them to be in the range of 79 to 91.6 kJ/mol. Beierlein et al.<sup>4</sup> studied structure-activity relationships of CO<sub>2</sub> methanation and reported that all catalysts had similar values of activation energies, between 79 and 86 kJ/mol. Garbarino et al.<sup>5</sup> reported similar apparent activation energies for Ni/Al<sub>2</sub>O<sub>3</sub> (80 kJ/mol); the same authors<sup>6</sup> reported activation energy of 75 kJ/mol for catalysts containing smaller particles of Ni; Lefebvre et al.<sup>7</sup> found the apparent activation energy is 79 kJ/mol; Konishcheva et al.<sup>8</sup> reported activation energy of 90 kJ/mol on Ni(Cl)/CeO<sub>2</sub> for CO<sub>2</sub> methanation and 140 kJ/mol for CO methanation. Tada et al.<sup>9</sup> presented sponge Ni as a promising catalyst for CO<sub>2</sub> methanation with apparent activation energy of 70 kJ/mol to 99 kJ/mol on NiO/CeO<sub>2</sub>.

In contrast, the activation energy for Reaction-3 reported in Table 1 as 243.9 kJ/mol. Since Xu & Froment<sup>1</sup> had written the rate expressions for reforming and WGS, this is the activation energy for methane reforming to CO<sub>2</sub>, i.e.  $\text{CH}_4 + 2\text{H}_2\text{O} \rightleftharpoons \text{CO}_2 + 4\text{H}_2$ . Let us consider the CO<sub>2</sub> methanation reaction:

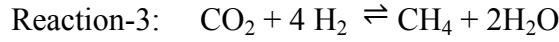

$$r_3 = -\frac{1}{\text{Den}^2} \frac{k_3}{p_{\text{H}_2}^{3.5}} \left( p_{\text{CH}_4} p_{\text{H}_2\text{O}}^2 - \frac{p_{\text{H}_2}^4 p_{\text{CO}_2}}{K_3} \right) = \frac{k_3}{\text{Den}^2 \cdot p_{\text{H}_2}^{3.5}} \left( \frac{p_{\text{H}_2}^4 p_{\text{CO}_2}}{K_3} - p_{\text{CH}_4} p_{\text{H}_2\text{O}}^2 \right) \quad (3)$$

This can be written in a normal “reversible” form as

$$r_3 = \frac{k_3}{\text{Den}^2} \frac{p_{\text{H}_2}^{0.5} p_{\text{CO}_2}}{K_3} \left( 1 - \frac{K_3 p_{\text{CH}_4} p_{\text{H}_2\text{O}}^2}{p_{\text{H}_2}^4 p_{\text{CO}_2}} \right)$$

$$= \frac{\bar{k}_3 p_{\text{CO}_2} \sqrt{p_{\text{H}_2}}}{\text{Den}^2} \left( 1 - K_3 \frac{p_{\text{CH}_4} p_{\text{H}_2\text{O}}^2}{p_{\text{H}_2}^4 p_{\text{CO}_2}} \right)$$

where,  $\bar{k}_3 = k_3/K_3$ . Using the expressions given in Tables 1 and 2 of the manuscript, we computed  $\bar{k}_3$  for temperatures in the range of 300 to 900 K. Figure S1 shows that  $\ln(\bar{k}_3)$  vs.  $1/T$  is linear, with the Arrhenius equation for  $\bar{k}_3$  showing an excellent fit:

$$\bar{k}_3 = 4.71e4 \exp\left(-\frac{8364.7}{T}\right)$$

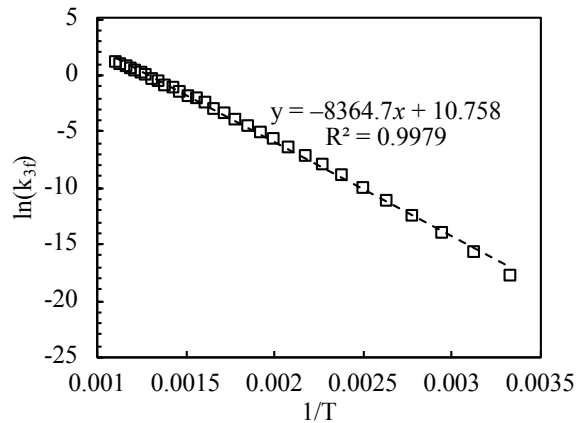

**Figure S1:** Numerical calculation of activation energy for the forward reaction for  $\text{CO}_2$  methanation. Symbols represent the value obtained by substituting rate constants from Table 1 and Table 2, whereas the line represents a linear fit.

With this expression, the activation energy for  $\text{CO}_2$  methanation is 69.54 kJ/mol, which falls in the range of what is reported in the literature. In summary, it could be argued that the rate of Reaction-3 would be mathematically equivalent to:

$$r_3 = \frac{k_3 p_{\text{CO}_2} \sqrt{p_{\text{H}_2}}}{\text{Den}^2} \left( 1 - \frac{1}{K_3} \frac{p_{\text{CH}_4} p_{\text{H}_2\text{O}}^2}{p_{\text{H}_2}^4 p_{\text{CO}_2}} \right) \quad (4)$$

$$k_3 = \bar{A}_3 \exp\left(-\frac{E_3}{RT}\right), \quad \bar{A}_3 = 4.71 \times 10^4 \frac{\text{kmol}}{\text{bar}^{1.5} \cdot \text{m}^2 \cdot \text{s}}, \quad E_3 = 69.54 \frac{\text{kJ}}{\text{mol}}, \quad (4\text{-a})$$

$$\bar{K}_3 = 0.974 \exp\left(33.165 + \frac{28183.2}{T^2} + \frac{17429.8}{T} - 8.254 \ln(T) + 0.0028T\right) \quad (4\text{-b})$$

## References

- [1] J. Xu and G. F. Froment, Methane Steam Reforming, Methanation and Water-Gas Shift: 1. Intrinsic Kinetics, *AIChE J.*, 1989, 35(1), 88–96.
- [2] G. D. Weatherbee and C. H. Bartholomew, Hydrogenation of CO<sub>2</sub> on group VIII metals. II. Kinetics and mechanism of CO<sub>2</sub> hydrogenation on Ni, *J. Catal.*, 1982, 77, 460–472.
- [3] R. Maatman and S. Hiemstra, A Kinetic Study of the Methanation of CO<sub>2</sub> over Nickel-Alumina, 1980, vol. 62, pp. 349–356.
- [4] D. Beierlein, D. Häussermann, M. Pfeifer, T. Schwarz, K. Stöwe, Y. Traa and E. Klemm, Is the CO<sub>2</sub> methanation on highly loaded Ni-Al<sub>2</sub>O<sub>3</sub> catalysts really structure-sensitive?, *Appl. Catal., B*, 2019, 247, 200–219.
- [5] G. Garbarino, C. Wang, T. Cavattoni, E. Finocchio, P. Riani, M. Flytzani-Stephanopoulos and G. Busca, A study of Ni/La- Al<sub>2</sub>O<sub>3</sub> catalysts: A competitive system for CO<sub>2</sub> methanation, *Appl. Catal., B*, 2019, 248, 286–297.
- [6] G. Garbarino, P. Riani, L. Magistri and G. Busca, A study of 1 the methanation of carbon dioxide on Ni/Al<sub>2</sub>O<sub>3</sub> catalysts at atmospheric pressure, *Int. J. Hydrogen Energy*, 2014, 39, 11557–11565.
- [7] J. Lefebvre, S. Bajohr and T. Kolb, A comparison of two- 5 phase and three-phase CO<sub>2</sub> methanation reaction kinetics, *Fuel*, 2019, 239, 896–904.
- [8] M. V. Konishcheva, D. I. Potemkin, P. V. Snytnikov and V. A. Sobyenin, The influence of CO, CO<sub>2</sub> and H<sub>2</sub>O on selective CO methanation over Ni(Cl)/CeO<sub>2</sub> catalyst: On the way to 10 formic acid derived CO-free hydrogen, *Int. J. Hydrogen Energy*, 2019, 44, 9978–9986.
- [9] S. Tada, S. Ikeda, N. Shimoda, T. Honma, M. Takahashi, A. Nariyuki and S. Satokawa, Sponge Ni catalyst with high activity in CO<sub>2</sub> methanation, *Int. J. Hydrogen Energy*, 15 2017, 42, 30126–30134.
